# Supplementary material for: Using Machine Learning to Expand the Ann Arbor Staging System for Hodgkin and Non-Hodgkin Lymphoma
Source: MDPI journal article supplement (doi:10.3390/biomedinformatics3030035), 2023-07-03
Supplement: s1 [file s1]

**Supplementary Table S1. Definitions of levels of stage, site, type, age, and sex for lymphoma.**

| <b><i>Prognostic Factors</i></b>   | <b><i>Levels</i></b> | <b><i>Definitions</i></b>                                                                                                                                                                                                                                                                                                                                                                                                                         |
|------------------------------------|----------------------|---------------------------------------------------------------------------------------------------------------------------------------------------------------------------------------------------------------------------------------------------------------------------------------------------------------------------------------------------------------------------------------------------------------------------------------------------|
| <i>Ann Arbor Stage<sup>a</sup></i> | <i>I</i>             | <i>Involvement of a single lymphatic site (i.e., nodal region, Waldeyer's ring, thymus or spleen) (I); or localized involvement of a single extralymphatic organ or site in the absence of any lymph node involvement (IE) (rare in Hodgkin lymphoma).</i>                                                                                                                                                                                        |
|                                    | <i>II</i>            | <i>Involvement of two or more lymph node regions on the same side of the diaphragm (II); or localized involvement of a single extralymphatic organ or site in association with regional lymph node involvement with or without involvement of other lymph node regions on the same side of the diaphragm (IIE). The number of regions involved may be indicated by an arabic numeral, as in, for example, II3.</i>                                |
|                                    | <i>III</i>           | <i>Involvement of lymph node regions on both sides of the diaphragm (III), which also maybe accompanied by extralymphatic extension in association with adjacent lymph node involvement (IIIE) or by involvement of the spleen (IIIS) or both (IIIE,S). Splenic involvement is designated by the letter S.</i>                                                                                                                                    |
|                                    | <i>IV</i>            | <i>Diffuse or disseminated involvement of one or more extralymphatic organs, with or without associated lymph node involvement; or isolated extralymphatic organ involvement in the absence of adjacent regional lymph node involvement, but in conjunction with disease in distant site(s). Stage IV includes any involvement of the liver or bone marrow, lungs (other than by direct extension from another site), or cerebrospinal fluid.</i> |
| <i>Site<sup>b</sup></i>            | <i>N</i>             | <i>Nodal</i>                                                                                                                                                                                                                                                                                                                                                                                                                                      |
|                                    | <i>EN</i>            | <i>Extranodal</i>                                                                                                                                                                                                                                                                                                                                                                                                                                 |
| <i>Type<sup>b</sup></i>            | <i>HL</i>            | <i>Hodgkin lymphoma</i>                                                                                                                                                                                                                                                                                                                                                                                                                           |
|                                    | <i>NHL</i>           | <i>Non-Hodgkin lymphoma</i>                                                                                                                                                                                                                                                                                                                                                                                                                       |
| <i>Age (A)</i>                     | <i>Y</i>             | <i>Age &lt; 60</i>                                                                                                                                                                                                                                                                                                                                                                                                                                |
|                                    | <i>O</i>             | <i>Age ≥ 60</i>                                                                                                                                                                                                                                                                                                                                                                                                                                   |
| <i>Sex (S)</i>                     | <i>F</i>             | <i>Female</i>                                                                                                                                                                                                                                                                                                                                                                                                                                     |
|                                    | <i>M</i>             | <i>Male</i>                                                                                                                                                                                                                                                                                                                                                                                                                                       |

<sup>a</sup>Edge SB, Byrd DR, Compton CC, Fritz AG, Greene FL, Trotti A. AJCC Cancer Staging Manual, 7th edn. New York: Springer-Verlag. 2010.

<sup>b</sup>Site Recode ICD-O-3/WHO 2008 Definition. Available online at:  
[https://seer.cancer.gov/siterecode/icdo3\\_dwho/home/index.html](https://seer.cancer.gov/siterecode/icdo3_dwho/home/index.html)

**Supplementary Table S2. EACCD grouping of lymphoma patients according to stage, site, type, age, and sex.**

| <i>Stage</i>   | <i>Site</i> | <i>Type</i> | <i>Age</i> | <i>Sex</i> |
|----------------|-------------|-------------|------------|------------|
| <b>Group 1</b> |             |             |            |            |
| IA             | EN          | NHL         | Y          | F          |
| IA             | EN          | NHL         | Y          | M          |
| IA             | N           | HL          | Y          | F          |
| IA             | N           | HL          | Y          | M          |
| IA             | N           | NHL         | Y          | F          |
| IB             | EN          | NHL         | Y          | M          |
| IB             | N           | HL          | Y          | F          |
| IEA            | EN          | HL          | Y          | F          |
| IEA            | EN          | HL          | Y          | M          |
| IEA            | N           | NHL         | Y          | M          |
| IIA            | N           | HL          | Y          | F          |
| IIA            | N           | HL          | Y          | M          |
| IIB            | N           | HL          | Y          | F          |
| IIB            | N           | HL          | Y          | M          |
| IIEA           | EN          | HL          | Y          | F          |
| IIEA           | EN          | HL          | Y          | M          |
| IIEA           | N           | HL          | Y          | F          |
| IIEA           | N           | HL          | Y          | M          |
| IIEB           | N           | HL          | Y          | F          |
| IIIA           | N           | HL          | Y          | F          |
| IIISA          | N           | HL          | Y          | F          |
| ISA            | N           | NHL         | Y          | F          |
| IVA            | N           | HL          | Y          | F          |
| <b>Group 2</b> |             |             |            |            |
| IA             | EN          | NHL         | O          | F          |
| IA             | EN          | NHL         | O          | M          |
| IA             | N           | NHL         | Y          | M          |
| IB             | EN          | NHL         | Y          | F          |
| IB             | N           | HL          | Y          | M          |
| IEA            | EN          | NHL         | Y          | F          |
| IIA            | N           | NHL         | Y          | F          |
| IIA            | N           | NHL         | Y          | M          |
| IIEA           | EN          | NHL         | Y          | F          |
| IIEA           | N           | NHL         | Y          | F          |
| IIEB           | EN          | HL          | Y          | M          |
| IIEB           | N           | HL          | Y          | M          |
| IIIA           | EN          | NHL         | Y          | F          |
| IIIA           | N           | HL          | Y          | M          |
| IIIB           | N           | HL          | Y          | F          |

|                |    |     |   |   |
|----------------|----|-----|---|---|
| IIIEB          | N  | HL  | Y | M |
| IIIESB         | N  | HL  | Y | F |
| IIIESB         | N  | HL  | Y | M |
| IIISA          | N  | HL  | Y | M |
| IIISB          | N  | HL  | Y | M |
| IISB           | N  | NHL | Y | F |
| <b>Group 3</b> |    |     |   |   |
| IB             | EN | NHL | O | F |
| IB             | EN | NHL | O | M |
| IB             | N  | NHL | Y | F |
| IB             | N  | NHL | Y | M |
| IEA            | EN | NHL | Y | M |
| IEB            | EN | NHL | Y | F |
| IIA            | EN | NHL | Y | F |
| IIA            | EN | NHL | Y | M |
| IIB            | EN | NHL | Y | F |
| IIB            | EN | NHL | Y | M |
| IIB            | N  | NHL | Y | F |
| IIEA           | EN | NHL | Y | M |
| IIEA           | N  | NHL | Y | M |
| IIEB           | EN | NHL | Y | F |
| IIIA           | N  | NHL | Y | F |
| IIIA           | N  | NHL | Y | M |
| IIIB           | N  | HL  | Y | M |
| IIIEA          | EN | NHL | Y | F |
| IIIEA          | N  | HL  | Y | M |
| IIIESA         | N  | NHL | Y | F |
| IIISB          | N  | HL  | Y | F |
| IISA           | N  | NHL | Y | F |
| ISA            | N  | NHL | O | M |
| ISA            | N  | NHL | Y | M |
| ISB            | N  | NHL | Y | F |
| IVA            | N  | HL  | Y | M |
| IVB            | N  | HL  | Y | F |
| <b>Group 4</b> |    |     |   |   |
| IA             | N  | HL  | O | F |
| IA             | N  | HL  | O | M |
| IA             | N  | NHL | O | F |
| IA             | N  | NHL | O | M |
| IEA            | N  | NHL | O | F |
| IIA            | N  | HL  | O | M |
| IIB            | N  | NHL | Y | M |
| IIEB           | N  | NHL | Y | F |

|                |    |     |   |   |
|----------------|----|-----|---|---|
| IIEB           | N  | NHL | Y | M |
| IIESA          | EN | NHL | Y | M |
| IIIB           | N  | NHL | Y | F |
| IIIEA          | N  | HL  | Y | F |
| IIIEA          | N  | NHL | Y | F |
| IIIEA          | N  | NHL | Y | M |
| IIIEB          | N  | HL  | Y | F |
| IIISA          | N  | NHL | Y | F |
| IIISB          | N  | NHL | Y | F |
| IISA           | N  | NHL | Y | M |
| IISB           | N  | NHL | Y | M |
| ISA            | N  | NHL | O | F |
| IVA            | EN | NHL | Y | F |
| IVA            | N  | NHL | Y | F |
| IVB            | N  | HL  | Y | M |
| <b>Group 5</b> |    |     |   |   |
| IEA            | EN | NHL | O | F |
| IEA            | EN | NHL | O | M |
| IEA            | N  | NHL | O | M |
| IEB            | EN | NHL | Y | M |
| IIA            | EN | NHL | O | M |
| IIA            | N  | HL  | O | F |
| IIA            | N  | NHL | O | F |
| IIA            | N  | NHL | O | M |
| IIB            | EN | NHL | O | M |
| IIEB           | EN | NHL | Y | M |
| IIESA          | N  | NHL | O | M |
| IIIA           | EN | NHL | Y | M |
| IIIB           | EN | NHL | Y | M |
| IIIB           | N  | NHL | Y | M |
| IIIEA          | EN | NHL | Y | M |
| IIIEB          | EN | NHL | Y | F |
| IIIEB          | EN | NHL | Y | M |
| IIIEB          | N  | NHL | Y | F |
| IIISA          | N  | NHL | Y | M |
| ISB            | N  | NHL | O | F |
| ISB            | N  | NHL | Y | M |
| IVA            | EN | NHL | Y | M |
| IVA            | N  | NHL | Y | M |
| IVB            | EN | HL  | Y | M |
| IVB            | EN | NHL | Y | F |
| <b>Group 6</b> |    |     |   |   |
| IB             | N  | HL  | O | F |

|                |    |     |   |   |
|----------------|----|-----|---|---|
| IB             | N  | HL  | O | M |
| IB             | N  | NHL | O | F |
| IEB            | EN | NHL | O | F |
| IIA            | EN | NHL | O | F |
| IIB            | EN | NHL | O | F |
| IIEA           | EN | NHL | O | F |
| IIEA           | EN | NHL | O | M |
| IIEA           | N  | NHL | O | F |
| IIEA           | N  | NHL | O | M |
| IIESA          | EN | NHL | O | F |
| IIIA           | EN | NHL | O | F |
| IIIA           | EN | NHL | O | M |
| IIIA           | N  | HL  | O | M |
| IIIA           | N  | NHL | O | F |
| IIIA           | N  | NHL | O | M |
| IIIB           | EN | NHL | O | F |
| IIIEA          | N  | NHL | O | F |
| IIIEA          | N  | NHL | O | M |
| IIIEB          | N  | NHL | Y | M |
| IIIESA         | EN | NHL | O | M |
| IIIESB         | N  | NHL | Y | M |
| IIISA          | N  | HL  | O | F |
| IIISB          | N  | NHL | Y | M |
| IISA           | N  | NHL | O | F |
| ISB            | N  | NHL | O | M |
| IVB            | N  | NHL | Y | F |
| <b>Group 7</b> |    |     |   |   |
| IB             | N  | NHL | O | M |
| IEB            | EN | NHL | O | M |
| IIB            | N  | HL  | O | F |
| IIB            | N  | HL  | O | M |
| IIB            | N  | NHL | O | F |
| IIB            | N  | NHL | O | M |
| IIEB           | EN | NHL | O | F |
| IIESB          | N  | NHL | Y | M |
| IIIA           | N  | HL  | O | F |
| IIIB           | N  | HL  | O | F |
| IIIB           | N  | NHL | O | F |
| IIIEA          | EN | NHL | O | F |
| IIIEA          | EN | NHL | O | M |
| IIIESA         | N  | NHL | O | M |
| IIIESA         | N  | NHL | Y | M |
| IIIESB         | N  | NHL | O | F |

|                |    |     |   |   |
|----------------|----|-----|---|---|
| IIISA          | N  | NHL | O | F |
| IIISA          | N  | NHL | O | M |
| IIISB          | N  | HL  | O | M |
| IISA           | N  | NHL | O | M |
| IISB           | N  | NHL | O | M |
| IVA            | EN | NHL | O | F |
| IVA            | EN | NHL | O | M |
| IVA            | N  | NHL | O | F |
| IVA            | N  | NHL | O | M |
| IVB            | EN | NHL | Y | M |
| IVB            | N  | NHL | Y | M |
| <b>Group 8</b> |    |     |   |   |
| IIEB           | EN | NHL | O | M |
| IIEB           | N  | NHL | O | F |
| IIEB           | N  | NHL | O | M |
| IIESA          | N  | NHL | O | F |
| IIESB          | EN | NHL | O | M |
| IIESB          | N  | NHL | O | F |
| IIESB          | N  | NHL | O | M |
| IIIB           | EN | NHL | O | M |
| IIIB           | N  | HL  | O | M |
| IIIB           | N  | NHL | O | M |
| IIIEB          | EN | NHL | O | F |
| IIIEB          | EN | NHL | O | M |
| IIIEB          | N  | NHL | O | F |
| IIIEB          | N  | NHL | O | M |
| IIIESA         | EN | NHL | O | F |
| IIIESA         | N  | NHL | O | F |
| IIIESB         | N  | NHL | O | M |
| IIISA          | N  | HL  | O | M |
| IIISB          | N  | HL  | O | F |
| IIISB          | N  | NHL | O | F |
| IIISB          | N  | NHL | O | M |
| IISB           | N  | NHL | O | F |
| IVA            | N  | HL  | O | F |
| IVA            | N  | HL  | O | M |
| IVB            | EN | NHL | O | F |
| IVB            | EN | NHL | O | M |
| IVB            | N  | HL  | O | F |
| IVB            | N  | HL  | O | M |
| IVB            | N  | NHL | O | F |
| IVB            | N  | NHL | O | M |

**Supplementary Table S3. Output of the Cox proportional hazards regression model and the logrank test for EACCD grouping on the basis of stage, site, type, age, and sex on the training set.** The p-value for the hazard ratio is from the Wald test testing the null hypothesis that the hazard ratio equals 1. The p-value for the logrank test is from the logrank test testing the null hypothesis that two survival curves are equal.

|                        | Training Set          |                          |                          | Validation Set        |                          |                          |
|------------------------|-----------------------|--------------------------|--------------------------|-----------------------|--------------------------|--------------------------|
| <b>Groups Compared</b> | Hazard Ratio (95% CI) | P-value for Hazard Ratio | P-value for Logrank Test | Hazard Ratio (95% CI) | P-value for Hazard Ratio | P-value for Logrank Test |
| 2 vs 1                 | 2.45 (2.23,2.70)      | $2.0 \times 10^{-75}$    | $1.9 \times 10^{-80}$    | 1.82 (1.26,2.64)      | 0.0015                   | 0.0013                   |
| 3 vs 2                 | 1.55 (1.45,1.66)      | $1.5 \times 10^{-35}$    | $4.5 \times 10^{-36}$    | 1.81 (1.38,2.38)      | $1.8 \times 10^{-5}$     | $1.3 \times 10^{-5}$     |
| 4 vs 3                 | 1.54 (1.46,1.63)      | $1.5 \times 10^{-55}$    | $2.1 \times 10^{-56}$    | 1.56 (1.28,1.90)      | $1.2 \times 10^{-5}$     | $9.8 \times 10^{-6}$     |
| 5 vs 4                 | 1.31 (1.26,1.36)      | $2.6 \times 10^{-38}$    | $1.9 \times 10^{-38}$    | 1.47 (1.28,1.70)      | $6.3 \times 10^{-8}$     | $5.3 \times 10^{-8}$     |
| 6 vs 5                 | 1.32 (1.27,1.36)      | $3.8 \times 10^{-52}$    | $1.7 \times 10^{-52}$    | 1.19 (1.06,1.34)      | 0.0039                   | 0.0039                   |
| 7 vs 6                 | 1.31 (1.27,1.36)      | $6.8 \times 10^{-64}$    | $5.3 \times 10^{-64}$    | 1.48 (1.34,1.54)      | $1.0 \times 10^{-13}$    | $7.7 \times 10^{-14}$    |
| 8 vs 7                 | 1.47 (1.43,1.51)      | $1.8 \times 10^{-153}$   | $1.3 \times 10^{-154}$   | 1.42 (1.30,1.55)      | $1.9 \times 10^{-14}$    | $1.5 \times 10^{-14}$    |

**Supplementary Table S4. Contingency table between EACCD groups and Ann Arbor principal stages.**

| Ann Arbor \ EACCD | <b>1</b> | <b>2</b> | <b>3</b> | <b>4</b> | <b>5</b> | <b>6</b> | <b>7</b> | <b>8</b> | <b>Total</b> |
|-------------------|----------|----------|----------|----------|----------|----------|----------|----------|--------------|
| <b>I</b>          | 4,828    | 6,238    | 4,685    | 7,446    | 10,953   | 1,335    | 1,280    | 0        | 36,765       |
| <b>II</b>         | 6,476    | 3,769    | 2,186    | 1,383    | 5,438    | 4,075    | 2,190    | 959      | 26,476       |
| <b>III</b>        | 542      | 1,509    | 4,221    | 1,355    | 1,750    | 8,131    | 3,298    | 3,295    | 24,101       |
| <b>IV</b>         | 368      | 0        | 1,017    | 4,506    | 5,257    | 1,672    | 22,070   | 9,493    | 44,383       |
| <b>Total</b>      | 12,214   | 11,516   | 12,109   | 14,690   | 23,398   | 15,213   | 28,838   | 13,747   | 131,725      |



**Supplementary Table S5. Contingency table between EACCD groups and Ann Arbor substages.**

| Ann Arbor \ EACCD | 1      | 2      | 3      | 4      | 5      | 6      | 7      | 8      | Total   |
|-------------------|--------|--------|--------|--------|--------|--------|--------|--------|---------|
| <b>IA</b>         | 4,331  | 3,208  | 0      | 7,205  | 0      | 0      | 0      | 0      | 14,744  |
| <b>IB</b>         | 347    | 399    | 1,067  | 0      | 0      | 652    | 532    | 0      | 2,997   |
| <b>IEA</b>        | 97     | 2,631  | 3,054  | 45     | 10,263 | 0      | 0      | 0      | 16,090  |
| <b>IEB</b>        | 0      | 0      | 328    | 0      | 584    | 616    | 748    | 0      | 2,276   |
| <b>ISA</b>        | 53     | 0      | 208    | 196    | 0      | 0      | 0      | 0      | 457     |
| <b>ISB</b>        | 0      | 0      | 28     | 0      | 106    | 67     | 0      | 0      | 201     |
| <b>IIA</b>        | 3,902  | 2,698  | 140    | 288    | 4,938  | 88     | 0      | 0      | 12,054  |
| <b>IIB</b>        | 2,205  | 0      | 603    | 598    | 99     | 58     | 1,562  | 0      | 5,125   |
| <b>IIEA</b>       | 278    | 897    | 1,219  | 0      | 0      | 3,748  | 0      | 0      | 6,142   |
| <b>IEEB</b>       | 91     | 131    | 176    | 315    | 364    | 0      | 302    | 749    | 2,128   |
| <b>IISA</b>       | 0      | 0      | 48     | 78     | 0      | 150    | 177    | 0      | 453     |
| <b>IISB</b>       | 0      | 43     | 0      | 74     | 0      | 0      | 124    | 92     | 333     |
| <b>IIESA</b>      | 0      | 0      | 0      | 30     | 37     | 31     | 0      | 35     | 133     |
| <b>IIESB</b>      | 0      | 0      | 0      | 0      | 0      | 0      | 25     | 83     | 108     |
| <b>IIIA</b>       | 400    | 561    | 3,250  | 0      | 70     | 6,800  | 194    | 0      | 11,275  |
| <b>IIIB</b>       | 0      | 370    | 658    | 631    | 1,047  | 43     | 1,432  | 1,817  | 5,998   |
| <b>IIIEA</b>      | 0      | 0      | 137    | 401    | 162    | 717    | 555    | 0      | 1,972   |
| <b>IIIEB</b>      | 0      | 38     | 0      | 32     | 230    | 146    | 0      | 564    | 1,010   |
| <b>IIISA</b>      | 142    | 160    | 0      | 152    | 241    | 39     | 856    | 44     | 1,634   |
| <b>IIISB</b>      | 0      | 321    | 141    | 139    | 0      | 295    | 71     | 700    | 1,667   |
| <b>IIIESA</b>     | 0      | 0      | 35     | 0      | 0      | 34     | 128    | 102    | 299     |
| <b>IIIESB</b>     | 0      | 59     | 0      | 0      | 0      | 57     | 62     | 68     | 246     |
| <b>IVA</b>        | 368    | 0      | 437    | 3,308  | 4,913  | 0      | 17,929 | 354    | 27,309  |
| <b>IVB</b>        | 0      | 0      | 580    | 1,198  | 344    | 1,672  | 4,141  | 9,139  | 17,074  |
| <b>Total</b>      | 12,214 | 11,516 | 12,109 | 14,690 | 23,398 | 15,213 | 28,838 | 13,747 | 131,725 |
